# Supplementary material for: Controlling Industrial Air-Pollutant Emissions under Multi-Factor Interactions Based on a Developed Hybrid-Factorial Environmental Input–Output Model
Source: MDPI journal article supplement (doi:10.3390/su15097717), 2023-05-08
Supplement: s1 [file s1]

## *Supplementary material*

### **Identifying optimal energy-related air pollution control strategy using a multistage factorial environment-oriented input-output model: A case study of Fujian province**

Y. J. Yang<sup>1</sup>, Y. P. Li<sup>2,3\*</sup>, J. Liu<sup>1</sup>, G. H. Huang<sup>2,3</sup>, G. Y. Wang<sup>1</sup>, H. Zhang<sup>1</sup>

<sup>1</sup> Fujian Engineering and Research Center of Rural Sewage Treatment and Water Safety, School of Environmental Science and Engineering, Xiamen University of Technology, Xiamen 361024, China

<sup>2\*</sup> Center for Energy, Environment and Ecology Research, School of Environment, Beijing Normal University, Beijing 100875, China

<sup>3</sup> Institute for Energy, Environment and Sustainable Communities, University of Regina, Regina, Sask, S4S 0A2, Canada

---

---

### **Detailed steps of Entropy-based TOPSIS method**

Entropy-TOPSIS method is an objective method in calculating index weights and it is particularly suitable for evaluating emerging new objects. The initial matrix of evaluation indicators is  $X = \{x_{ij}\}_{m \times n}$  ( $0 \leq i \leq m$ ,  $0 \leq j \leq n$ ), in which  $m$  is the number of analyzed scenarios,  $n$  is the number of environmental emission indicators. The weights of environmental emission indicator could be calculated through entropy method, as shown in Equations (S1) to (S4):

$$p_{ij} = \frac{x_{ij}}{\max x_j - \min x_j} \quad (S1)$$

$$e_j = -\frac{1}{\ln m} \sum_{i=1}^m p_{ij} \ln(p_{ij}) \quad (S2)$$

$$h_j = 1 - e_j \quad (S3)$$

$$\omega_j = \frac{h_j}{\sum_{j=1}^n h_j} \quad (S4)$$

The dimensionless processing is performed on normalize the influence of environmental

emission indicator matrix. The dimensionless data matrix could be obtained through Equation (S5):

$$x_{ij}^* = \frac{x_{ij}}{\sqrt{\sum_{i=1}^m x_{ij}^2}} \quad (S5)$$

The weighted normalized matrix could be calculated through Equation (S6):

$$y_{ij} = x_{ij}^* \times \omega_j \quad (S6)$$

Determine the positive ideal solution  $Y^+$  and negative ideal solution  $Y^-$ , where  $Y^+ = \min \{y_1, y_2, \dots, y_n\}$  and  $Y^- = \max \{y_1, y_2, \dots, y_n\}$ , the Euclidean Distance of scenario  $i$  to positive solution and negative positive could be calculated as follows:

$$D_i^+ = \sqrt{\sum_{j=1}^n (y_j^+ - y_{ij})^2} \quad (S7)$$

$$D_i^- = \sqrt{\sum_{j=1}^n (y_j^- - y_{ij})^2} \quad (S8)$$

The closeness degree of each analyzed scenario  $i$  to ideal solution could be defined as Equation (S9). According to the performance value of closeness degree, the evaluation value is arranged and ranked in the descending order. Optimized mitigation scheme could be obtained based on the simulated results.

$$f = \frac{D_i^+}{D_i^+ + D_i^-} \quad (S9)$$

In this study, system robustness, NO<sub>x</sub> emissions, SO<sub>2</sub> emissions, PM emissions and VOCs emissions are selected as the evaluation indicators. The standard values of original values of these indicators are shown in Table S7. According to these values, the weights of these indicators calculated by the entropy method are 0.717, 0.025, 0.021, 0.063 and 0.175, respectively. After forcing these values into the TOPSIS, the final closeness degree is obtained (as shown in Table S7), which shows that S1, S5, S9, S13, S17 and S21 possess high satisfactory scores. Therefore, these scenarios were selected for scheme analysis to find the optimal pollution mitigation strategy.

Table S1. Taguchi experiment orthogonal array

|     | ELE_coal | NON_coal | CHE_coal | MET_coal | TRA_gasoline | TRA_diesel | TRA_kerosene | TRA_fuel | EQU_a | TEX_a | SER_a | CON_a | WHO_a | NO <sub>x</sub> | SO <sub>2</sub> | PM | VOCs |
|-----|----------|----------|----------|----------|--------------|------------|--------------|----------|-------|-------|-------|-------|-------|-----------------|-----------------|----|------|
| S1  | L        | L        | L        | L        | L            | L          | L            | L        | L     | L     | L     | L     | L     | L               | L               | L  | L    |
| S2  | L        | L        | L        | L        | L            | L          | L            | L        | L     | L     | L     | L     | L     | L               | L               | H  | H    |
| S3  | L        | L        | L        | L        | L            | L          | L            | H        | H     | H     | H     | H     | H     | H               | H               | L  | L    |
| S4  | L        | L        | L        | L        | L            | L          | L            | H        | H     | H     | H     | H     | H     | H               | H               | H  | H    |
| S5  | L        | L        | L        | H        | H            | H          | H            | L        | L     | L     | L     | H     | H     | H               | H               | L  | L    |
| S6  | L        | L        | L        | H        | H            | H          | H            | L        | L     | L     | L     | H     | H     | H               | H               | H  | H    |
| S7  | L        | L        | L        | H        | H            | H          | H            | H        | H     | H     | H     | L     | L     | L               | L               | L  | L    |
| S8  | L        | L        | L        | H        | H            | H          | H            | H        | H     | H     | H     | L     | L     | L               | L               | H  | H    |
| S9  | L        | H        | H        | L        | L            | H          | H            | L        | L     | H     | H     | L     | L     | H               | H               | L  | L    |
| S10 | L        | H        | H        | L        | L            | H          | H            | L        | L     | H     | H     | L     | L     | H               | H               | H  | H    |
| S11 | L        | H        | H        | L        | L            | H          | H            | H        | H     | L     | L     | H     | H     | L               | L               | L  | L    |
| S12 | L        | H        | H        | L        | L            | H          | H            | H        | H     | L     | L     | H     | H     | L               | L               | H  | H    |
| S13 | L        | H        | H        | H        | H            | L          | L            | L        | L     | H     | H     | H     | H     | L               | L               | L  | L    |
| S14 | L        | H        | H        | H        | H            | L          | L            | L        | L     | H     | H     | H     | H     | L               | L               | H  | H    |
| S15 | L        | H        | H        | H        | H            | L          | L            | H        | H     | L     | L     | L     | L     | H               | H               | L  | L    |
| S16 | L        | H        | H        | H        | H            | L          | L            | H        | H     | L     | L     | L     | L     | H               | H               | H  | H    |
| S17 | H        | L        | H        | L        | H            | L          | H            | L        | H     | L     | H     | L     | H     | L               | H               | L  | H    |
| S18 | H        | L        | H        | L        | H            | L          | H            | L        | H     | L     | H     | L     | H     | L               | H               | H  | L    |
| S19 | H        | L        | H        | L        | H            | L          | H            | H        | L     | H     | L     | H     | L     | H               | L               | L  | H    |
| S20 | H        | L        | H        | L        | H            | L          | H            | H        | L     | H     | L     | H     | L     | H               | L               | H  | L    |
| S21 | H        | L        | H        | H        | L            | H          | L            | L        | H     | L     | H     | H     | L     | H               | L               | L  | H    |
| S22 | H        | L        | H        | H        | L            | H          | L            | L        | H     | L     | H     | H     | L     | H               | L               | H  | L    |
| S23 | H        | L        | H        | H        | L            | H          | L            | H        | L     | H     | L     | L     | H     | L               | H               | L  | H    |
| S24 | H        | L        | H        | H        | L            | H          | L            | H        | L     | H     | L     | L     | H     | L               | H               | H  | L    |
| S25 | H        | H        | L        | L        | H            | H          | L            | L        | H     | H     | L     | L     | H     | H               | L               | L  | H    |
| S26 | H        | H        | L        | L        | H            | H          | L            | L        | H     | H     | L     | L     | H     | H               | L               | H  | L    |
| S27 | H        | H        | L        | L        | H            | H          | L            | H        | L     | L     | H     | H     | L     | L               | H               | L  | H    |
| S28 | H        | H        | L        | L        | H            | H          | L            | H        | L     | L     | H     | H     | L     | L               | H               | H  | L    |
| S29 | H        | H        | L        | H        | L            | L          | H            | L        | H     | H     | L     | H     | L     | L               | H               | L  | H    |
| S30 | H        | H        | L        | H        | L            | L          | H            | L        | H     | H     | L     | H     | L     | L               | H               | H  | L    |
| S31 | H        | H        | L        | H        | L            | L          | H            | H        | L     | L     | H     | L     | H     | H               | L               | L  | H    |
| S32 | H        | H        | L        | H        | L            | L          | H            | H        | L     | L     | H     | L     | H     | H               | L               | H  | L    |

Note: H means high level, L means low level.

Table S2. Full factorial experiment orthogonal array

|     | ELE_coal | NON_coal | CHE_coal | EQU_a | NO <sub>x</sub> | SO <sub>2</sub> |     | ELE_coal | NON_coal | CHE_coal | EQU_a | NO <sub>x</sub> | SO <sub>2</sub> |     | ELE_coal | NON_coal | CHE_coal | EQU_a | NO <sub>x</sub> | SO <sub>2</sub> |
|-----|----------|----------|----------|-------|-----------------|-----------------|-----|----------|----------|----------|-------|-----------------|-----------------|-----|----------|----------|----------|-------|-----------------|-----------------|
| S1  | L        | L        | L        | L     | L               | L               | S23 | L        | H        | L        | H     | H               | L               | S45 | H        | L        | H        | H     | L               | L               |
| S2  | L        | L        | L        | L     | L               | H               | S24 | L        | H        | L        | H     | H               | H               | S46 | H        | L        | H        | H     | L               | H               |
| S3  | L        | L        | L        | L     | H               | L               | S25 | L        | H        | H        | L     | L               | L               | S47 | H        | L        | H        | H     | H               | L               |
| S4  | L        | L        | L        | L     | H               | H               | S26 | L        | H        | H        | L     | L               | H               | S48 | H        | L        | H        | H     | H               | H               |
| S5  | L        | L        | L        | H     | L               | L               | S27 | L        | H        | H        | L     | H               | L               | S49 | H        | H        | L        | L     | L               | L               |
| S6  | L        | L        | L        | H     | L               | H               | S28 | L        | H        | H        | L     | H               | H               | S50 | H        | H        | L        | L     | L               | H               |
| S7  | L        | L        | L        | H     | H               | L               | S29 | L        | H        | H        | H     | L               | L               | S51 | H        | H        | L        | L     | H               | L               |
| S8  | L        | L        | L        | H     | H               | H               | S30 | L        | H        | H        | H     | L               | H               | S52 | H        | H        | L        | L     | H               | H               |
| S9  | L        | L        | H        | L     | L               | L               | S31 | L        | H        | H        | H     | H               | L               | S53 | H        | H        | L        | H     | L               | L               |
| S10 | L        | L        | H        | L     | L               | H               | S32 | L        | H        | H        | H     | H               | H               | S54 | H        | H        | L        | H     | L               | H               |
| S11 | L        | L        | H        | L     | H               | L               | S33 | H        | L        | L        | L     | L               | L               | S55 | H        | H        | L        | H     | H               | L               |
| S12 | L        | L        | H        | L     | H               | H               | S34 | H        | L        | L        | L     | L               | H               | S56 | H        | H        | L        | H     | H               | H               |
| S13 | L        | L        | H        | H     | L               | L               | S35 | H        | L        | L        | L     | H               | L               | S57 | H        | H        | H        | L     | L               | L               |
| S14 | L        | L        | H        | H     | L               | H               | S36 | H        | L        | L        | L     | H               | H               | S58 | H        | H        | H        | L     | L               | H               |
| S15 | L        | L        | H        | H     | H               | L               | S37 | H        | L        | L        | H     | L               | L               | S59 | H        | H        | H        | L     | H               | L               |
| S16 | L        | L        | H        | H     | H               | H               | S38 | H        | L        | L        | H     | L               | H               | S60 | H        | H        | H        | L     | H               | H               |
| S17 | L        | H        | L        | L     | L               | L               | S39 | H        | L        | L        | H     | H               | L               | S61 | H        | H        | H        | H     | L               | L               |
| S18 | L        | H        | L        | L     | L               | H               | S40 | H        | L        | L        | H     | H               | H               | S62 | H        | H        | H        | H     | L               | H               |
| S19 | L        | H        | L        | L     | H               | L               | S41 | H        | L        | H        | L     | L               | L               | S63 | H        | H        | H        | H     | H               | L               |
| S20 | L        | H        | L        | L     | H               | H               | S42 | H        | L        | H        | L     | L               | H               | S64 | H        | H        | H        | H     | H               | H               |
| S21 | L        | H        | L        | H     | L               | L               | S43 | H        | L        | H        | L     | H               | L               |     |          |          |          |       |                 |                 |
| S22 | L        | H        | L        | H     | L               | H               | S44 | H        | L        | H        | L     | H               | H               |     |          |          |          |       |                 |                 |

Note: H means high level, L means low level

Table S3. P-value test results for design factors (Taguchi analysis, response is APEE)

| Designed factors | P value | Designed factors | P value |
|------------------|---------|------------------|---------|
| ELE_coal         | <0.001  | TEX_a            | 0.384   |
| NON_coal         | <0.001  | SER_a            | 0.551   |
| CHE_coal         | <0.001  | CON_a            | 0.366   |
| MET_coal         | <0.001  | WHO_a            | 0.196   |
| TRA_gasoline     | <0.001  | NO <sub>x</sub>  | <0.001  |
| TRA_diesel       | <0.001  | SO <sub>2</sub>  | <0.001  |
| TRA_kerosene     | <0.001  | PM               | <0.001  |
| TRA_fuel oil     | <0.001  | VOCs             | <0.001  |
| EQU_a            | 0.952   |                  |         |

Table S4. P-value test results for design factors (Taguchi analysis, response is robustness)

| Designed factors | P value | Designed factors | P value |
|------------------|---------|------------------|---------|
| ELE_coal         | <0.001  | TEX_a            | <0.001  |
| NON_coal         | <0.001  | SER_a            | <0.001  |
| CHE_coal         | <0.001  | CON_a            | <0.001  |
| MET_coal         | <0.001  | WHO_a            | <0.001  |
| TRA_gasoline     | 0.396   | NO <sub>x</sub>  | <0.001  |
| TRA_diesel       | <0.001  | SO <sub>2</sub>  | <0.001  |
| TRA_kerosene     | <0.001  | PM               | 0.038   |
| TRA_fuel oil     | <0.001  | VOCs             | 0.028   |
| EQU_a            | <0.001  |                  |         |

Table S5. P-value test results for design factors (full factorial analysis, response is APEE)

| Designed factors | P value | Designed factors | P value |
|------------------|---------|------------------|---------|
| ELE_coal         | <0.001  | TEX_a            | <0.001  |
| NON_coal         | <0.001  | NO <sub>x</sub>  | <0.001  |
| CHE_coal         | <0.001  | SO <sub>2</sub>  | <0.001  |

Table S6. P-value test results for design factors (full factorial analysis, response is robustness)

| Designed factors | P value | Designed factors | P value |
|------------------|---------|------------------|---------|
| ELE_coal         | <0.001  | TEX_a            | <0.001  |
| NON_coal         | <0.001  | NO <sub>x</sub>  | <0.001  |
| CHE_coal         | <0.001  | SO <sub>2</sub>  | <0.001  |



Table S7. Standardization of indicators and evaluation results of scenarios

| Scenario   | R            | NO <sub>x</sub> | SO <sub>2</sub> | PM           | VOCs         | F            | Scenario | R     | NO <sub>x</sub> | SO <sub>2</sub> | PM    | VOCs  | F     | Scenario | R     | NO <sub>x</sub> | SO <sub>2</sub> | PM    | VOCs  | F     |
|------------|--------------|-----------------|-----------------|--------------|--------------|--------------|----------|-------|-----------------|-----------------|-------|-------|-------|----------|-------|-----------------|-----------------|-------|-------|-------|
| <b>S1</b>  | <b>1.000</b> | <b>0.000</b>    | <b>0.000</b>    | <b>0.000</b> | <b>0.000</b> | <b>1.000</b> | S23      | 0.023 | 0.707           | 0.091           | 0.197 | 0.214 | 0.543 | S45      | 0.104 | 0.235           | 0.306           | 0.803 | 0.786 | 0.572 |
| S2         | 0.896        | 0.000           | 0.505           | 0.000        | 0.000        | 0.857        | S24      | 0.012 | 0.707           | 0.618           | 0.197 | 0.214 | 0.496 | S46      | 0.091 | 0.235           | 0.887           | 0.803 | 0.786 | 0.516 |
| S3         | 0.828        | 0.620           | 0.000           | 0.000        | 0.000        | 0.627        | S25      | 0.826 | 0.118           | 0.154           | 0.334 | 0.363 | 0.803 | S47      | 0.050 | 0.913           | 0.306           | 0.803 | 0.786 | 0.260 |
| S4         | 0.766        | 0.620           | 0.505           | 0.000        | 0.000        | 0.593        | S26      | 0.744 | 0.118           | 0.697           | 0.334 | 0.363 | 0.722 | S48      | 0.041 | 0.913           | 0.887           | 0.803 | 0.786 | 0.146 |
| <b>S5</b>  | <b>0.112</b> | <b>0.000</b>    | <b>0.000</b>    | <b>0.000</b> | <b>0.000</b> | <b>0.997</b> | S27      | 0.685 | 0.767           | 0.154           | 0.334 | 0.363 | 0.475 | S49      | 0.809 | 0.256           | 0.333           | 0.862 | 0.851 | 0.544 |
| S6         | 0.097        | 0.000           | 0.505           | 0.000        | 0.000        | 0.857        | S28      | 0.647 | 0.767           | 0.697           | 0.334 | 0.363 | 0.419 | S50      | 0.718 | 0.256           | 0.921           | 0.862 | 0.851 | 0.490 |
| S7         | 0.054        | 0.620           | 0.000           | 0.000        | 0.000        | 0.627        | S29      | 0.070 | 0.118           | 0.154           | 0.334 | 0.363 | 0.803 | S51      | 0.658 | 0.939           | 0.333           | 0.862 | 0.851 | 0.233 |
| S8         | 0.042        | 0.620           | 0.505           | 0.000        | 0.000        | 0.593        | S30      | 0.055 | 0.118           | 0.697           | 0.334 | 0.363 | 0.722 | S52      | 0.600 | 0.939           | 0.921           | 0.862 | 0.851 | 0.103 |
| <b>S9</b>  | <b>0.978</b> | <b>0.049</b>    | <b>0.063</b>    | <b>0.138</b> | <b>0.149</b> | <b>0.919</b> | S31      | 0.011 | 0.767           | 0.154           | 0.334 | 0.363 | 0.475 | S53      | 0.088 | 0.256           | 0.333           | 0.862 | 0.851 | 0.544 |
| S10        | 0.884        | 0.049           | 0.584           | 0.138        | 0.149        | 0.813        | S32      | 0.000 | 0.767           | 0.697           | 0.334 | 0.363 | 0.419 | S54      | 0.074 | 0.256           | 0.921           | 0.862 | 0.851 | 0.490 |
| S11        | 0.820        | 0.681           | 0.063           | 0.138        | 0.149        | 0.570        | S33      | 0.969 | 0.186           | 0.242           | 0.666 | 0.637 | 0.641 | S55      | 0.033 | 0.939           | 0.333           | 0.862 | 0.851 | 0.233 |
| S12        | 0.772        | 0.681           | 0.584           | 0.138        | 0.149        | 0.527        | S34      | 0.865 | 0.186           | 0.808           | 0.666 | 0.637 | 0.582 | S56      | 0.023 | 0.939           | 0.921           | 0.862 | 0.851 | 0.103 |
| <b>S13</b> | <b>0.099</b> | <b>0.049</b>    | <b>0.063</b>    | <b>0.138</b> | <b>0.149</b> | <b>0.919</b> | S35      | 0.799 | 0.852           | 0.242           | 0.666 | 0.637 | 0.331 | S57      | 0.800 | 0.304           | 0.396           | 1.000 | 1.000 | 0.484 |
| S14        | 0.084        | 0.049           | 0.584           | 0.138        | 0.149        | 0.813        | S36      | 0.731 | 0.852           | 0.808           | 0.666 | 0.637 | 0.244 | S58      | 0.717 | 0.304           | 1.000           | 1.000 | 1.000 | 0.436 |
| S15        | 0.041        | 0.681           | 0.063           | 0.138        | 0.149        | 0.570        | S37      | 0.115 | 0.186           | 0.242           | 0.666 | 0.637 | 0.641 | S59      | 0.659 | 1.000           | 0.396           | 1.000 | 1.000 | 0.188 |
| S16        | 0.030        | 0.681           | 0.584           | 0.138        | 0.149        | 0.527        | S38      | 0.101 | 0.186           | 0.808           | 0.666 | 0.637 | 0.582 | S60      | 0.611 | 1.000           | 1.000           | 1.000 | 1.000 | 0.002 |
| <b>S17</b> | <b>0.839</b> | <b>0.070</b>    | <b>0.091</b>    | <b>0.197</b> | <b>0.214</b> | <b>0.884</b> | S39      | 0.061 | 0.852           | 0.242           | 0.666 | 0.637 | 0.331 | S61      | 0.078 | 0.304           | 0.396           | 1.000 | 1.000 | 0.484 |
| S18        | 0.748        | 0.070           | 0.618           | 0.197        | 0.214        | 0.788        | S40      | 0.051 | 0.852           | 0.808           | 0.666 | 0.637 | 0.244 | S62      | 0.064 | 0.304           | 1.000           | 1.000 | 1.000 | 0.436 |
| S19        | 0.684        | 0.707           | 0.091           | 0.197        | 0.214        | 0.543        | S41      | 0.951 | 0.235           | 0.306           | 0.803 | 0.786 | 0.572 | S63      | 0.023 | 1.000           | 0.396           | 1.000 | 1.000 | 0.188 |
| S20        | 0.633        | 0.707           | 0.618           | 0.197        | 0.214        | 0.496        | S42      | 0.855 | 0.235           | 0.887           | 0.803 | 0.786 | 0.516 | S64      | 0.014 | 1.000           | 1.000           | 1.000 | 1.000 | 0.000 |
| <b>S21</b> | <b>0.082</b> | <b>0.070</b>    | <b>0.091</b>    | <b>0.197</b> | <b>0.214</b> | <b>0.884</b> | S43      | 0.793 | 0.913           | 0.306           | 0.803 | 0.786 | 0.260 |          |       |                 |                 |       |       |       |
| S22        | 0.067        | 0.070           | 0.618           | 0.197        | 0.214        | 0.788        | S44      | 0.735 | 0.913           | 0.887           | 0.803 | 0.786 | 0.146 |          |       |                 |                 |       |       |       |
